# Supplementary material
Source: MDPI journal article supplement (https://www.mdpi.com/2071-1050/16/2/750)
Supplement: s1 [file s1]

## Supplementary file

**Table S1.** Fruit flesh and skin N/Ca parameters for ‘Hass’ avocado sourced from three farms at different positions in the canopy. Data were rearranged as sun exposed (top + east +west) and shaded fruit (middle + bottom) based on ANOVA results and divided into three farms containing total of seven sampling blocks. F: farm, B: sampling block, and n: number of samples in each category.

| Farm      | Canopy position       | Parameters         | N/Ca   |        |
|-----------|-----------------------|--------------------|--------|--------|
|           |                       |                    | Flesh  | Skin   |
| F1 (B1-4) | Sun-exposed<br>(n=60) | Mean               | 53.58  | 28.13  |
|           |                       | Standard deviation | 17.46  | 8.85   |
|           |                       | Variance           | 304.85 | 78.27  |
|           |                       | Maximum            | 94.44  | 51.52  |
|           |                       | Minimum            | 17.66  | 11.41  |
|           | Shaded (n=40)         | Mean               | 75.75  | 38.95  |
|           |                       | Standard deviation | 27.18  | 13.77  |
|           |                       | Variance           | 738.50 | 189.61 |
|           |                       | Maximum            | 166.95 | 79.93  |
|           |                       | Minimum            | 31.09  | 15.71  |
| F2 (B5-6) | Sun-exposed<br>(n=30) | Mean               | 28.87  | 17.83  |
|           |                       | Standard deviation | 11.18  | 9.04   |
|           |                       | Variance           | 124.95 | 81.75  |
|           |                       | Maximum            | 60.63  | 58.46  |
|           |                       | Minimum            | 14.89  | 7.23   |
|           | Shaded (n=20)         | Mean               | 38.77  | 19.59  |
|           |                       | Standard deviation | 19.47  | 10.12  |
|           |                       | Variance           | 378.94 | 102.48 |
|           |                       | Maximum            | 108.05 | 55.83  |
|           |                       | Minimum            | 16.23  | 6.92   |
| F3 (B7)   | Sun-exposed<br>(n=15) | Mean               | 48.25  | 19.92  |
|           |                       | Standard deviation | 16.89  | 5.68   |
|           |                       | Variance           | 285.14 | 32.28  |
|           |                       | Maximum            | 84.18  | 32.82  |
|           |                       | Minimum            | 23.29  | 11.96  |
|           | Shaded (n=10)         | Mean               | 62.91  | 27.63  |
|           |                       | Standard deviation | 23.21  | 11.46  |
|           |                       | Variance           | 538.54 | 131.25 |
|           |                       | Maximum            | 96.88  | 45.00  |
|           |                       | Minimum            | 28.49  | 12.03  |

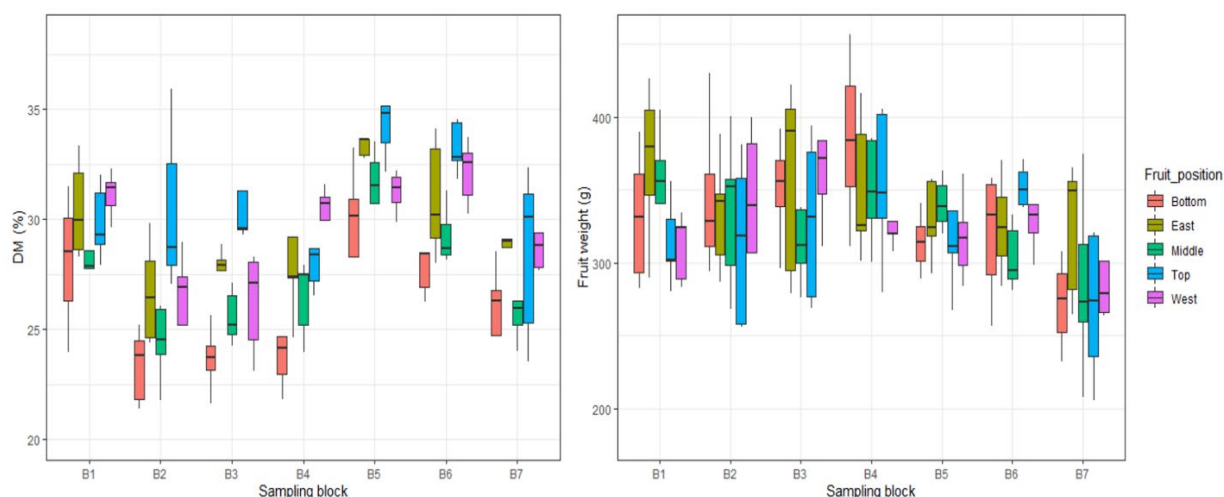

**Figure S1.** Data distribution indicated by box and whiskers plots for DM (%) and fruit weight (g) in 'Hass' avocado fruit at five different positions within the canopy across seven orchard blocks.

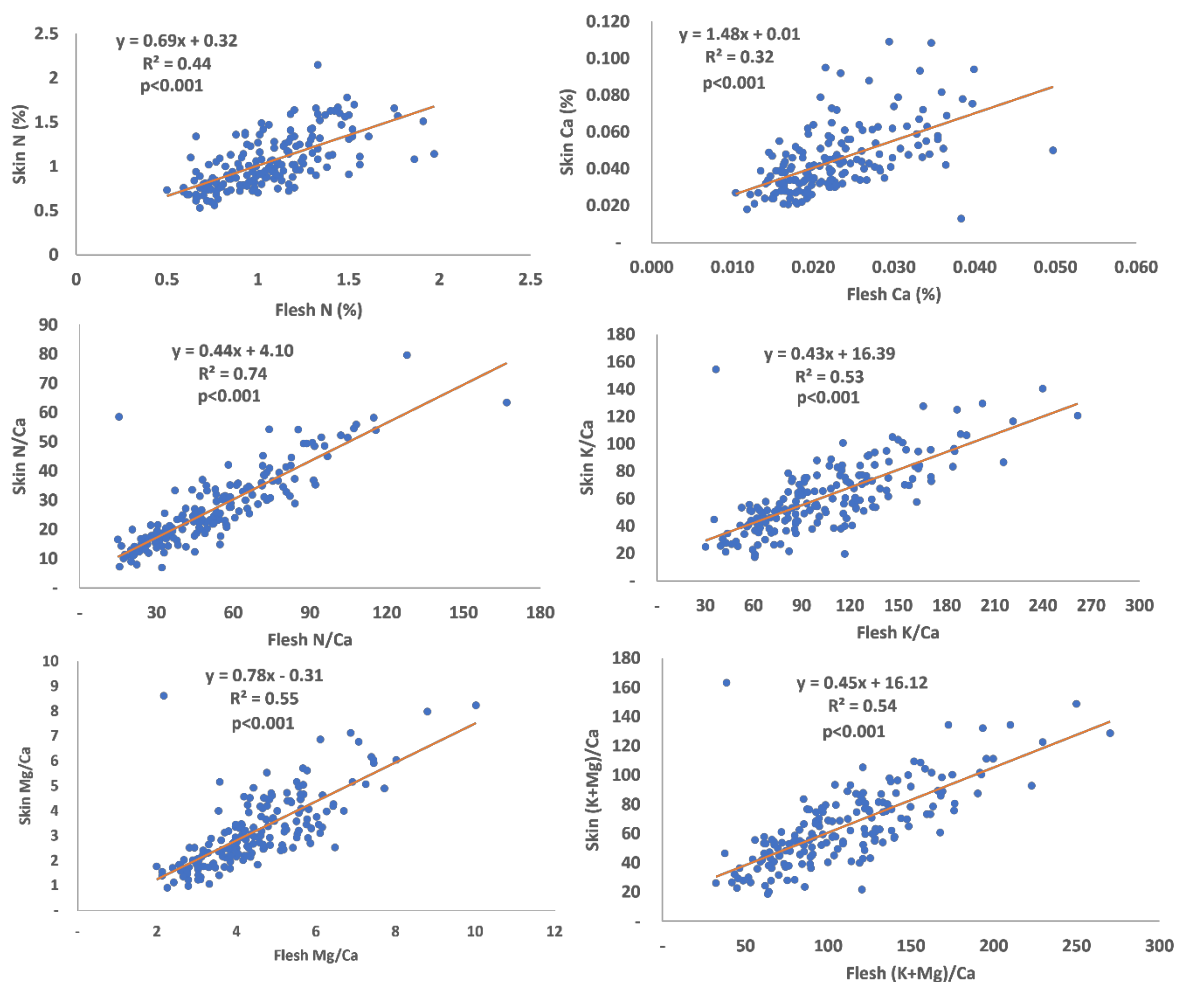

**Figure S2.** Regression correlation plots between fruit flesh and skin mineral concentrations and their ratios at harvest (n = 175).
