# Supplementary material
Source: MDPI journal article supplement (https://www.mdpi.com/2071-1050/16/2/750)
Supplement: s1 [file s1]

Archive with 1 entries (1 files):
- sustainability-2780707-supplementary.pdf
